## CORRECTION

# Correction: The role of art therapy on quality of life of women with recent pregnancy loss: A randomized clinical trial

Masumeh Zahmatkesh, Shahla Faal Siahkal, Fatemeh Alahverdi, Golshan Tahmasebi, Elham Ebrahimi

The affiliation for the fifth author is incorrect. The correct affiliation is not indicated. Elham Ebrahimi is not affiliated with #1 but with: Nursing and Midwifery Care Research Center, Department of Reproductive health and Midwifery, Tehran University of Medical Sciences, Tehran, Iran.

## Reference

1. Zahmatkesh M, Faal Siahkal S, Alahverdi F, Tahmasebi G, Ebrahimi E. The role of art therapy on quality of life of women with recent pregnancy loss: a randomized clinical trial. PLoS One. 2024;19(7): e0305403. <https://doi.org/10.1371/journal.pone.0305403> PMID: 39052552

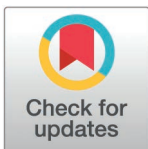

## OPEN ACCESS

**Citation:** Zahmatkesh M, Siahkal SF, Alahverdi F, Tahmasebi G, Ebrahimi E (2025) Correction: The role of art therapy on quality of life of women with recent pregnancy loss: A randomized clinical trial. PLoS ONE 20(3): e0321322. <https://doi.org/10.1371/journal.pone.0321322>

**Published:** March 27, 2025

**Copyright:** © 2025 Zahmatkesh et al. This is an open access article distributed under the terms of the [Creative Commons Attribution License](https://creativecommons.org/licenses/by/4.0/), which permits unrestricted use, distribution, and reproduction in any medium, provided the original author and source are credited.
